# Supplementary material
Source: Springer Nature journal article supplement (https://www.springermedizin.de/resource/supplementary/12895_2013_149_MOESM3_ESM.pdf/9514236)

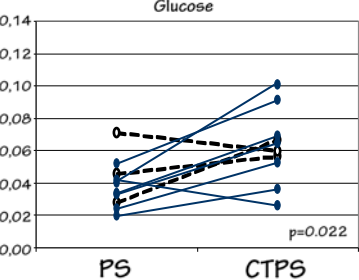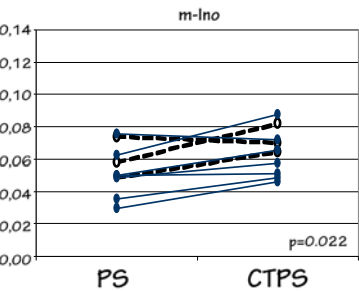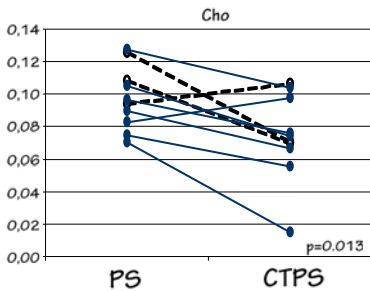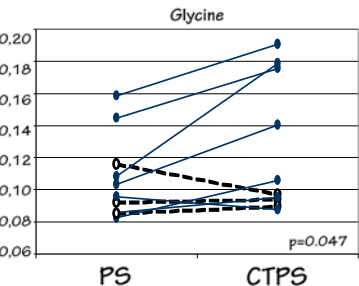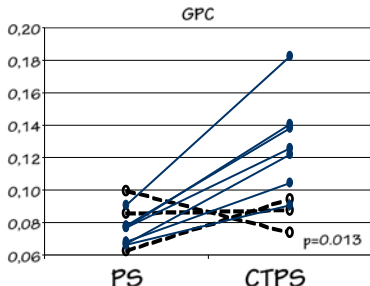

Supplement: MOESM3 [file 9514236]
